# Supplementary material
Source: bioRxiv or medRxiv preprint supplement (https://www.biorxiv.org/content/biorxiv/early/2019/11/29/859801/DC1/embed/media-1.pdf)

## Rigaill. Information content of cheek and lip colour in relation to the timing of ovulation in women

### Supplementary material

**Table S1.** Information about participants and photography and saliva sampling.

| Participant id   | Number of infants | Age (in years) | Observed cycle length | Samples analysed |
|------------------|-------------------|----------------|-----------------------|------------------|
| w1               | 0                 | 31             | 27                    | 12               |
| w2               | 0                 | 34             | 27                    | 11               |
| w3               | 0                 | 28             | 26                    | 8                |
| w4               | 0                 | 27             | 26                    | 12               |
| w5               | 1                 | 38             | 27                    | 10               |
| w6               | 0                 | 24             | 30                    | 13               |
| w7               | 0                 | 30             | 29                    | 12               |
| w8               | 0                 | 24             | 30                    | 12               |
| w9               | 0                 | 25             | 29                    | 10               |
| w10              | 0                 | 29             | 29                    | 11               |
| w11              | 0                 | 28             | 29                    | 9                |
| w12              | 0                 | 30             | 26                    | 10               |
| w13              | 0                 | 31             | 27                    | 11               |
| w14              | 0                 | 25             | 25                    | 11               |
| w15              | 0                 | 26             | 30                    | 13               |
| <i>mean ± SD</i> |                   | $26.7 \pm 3.9$ | $27.8 \pm 1.7$        | $11.0 \pm 1.4$   |

Participants reported their average cycle length (mean per participant =  $28.7 \pm \text{SD } 1.8$  days) and dates of the onset of previous and expected menstruations by email to the experimenter (LR). Sampling started within 1 and 10 days after the first day of menstruations (mean per participant =  $3.9 \pm \text{SD } 2.6$  days).

**Figure S1.** Picture of a participant lips showing the area used for color analyses

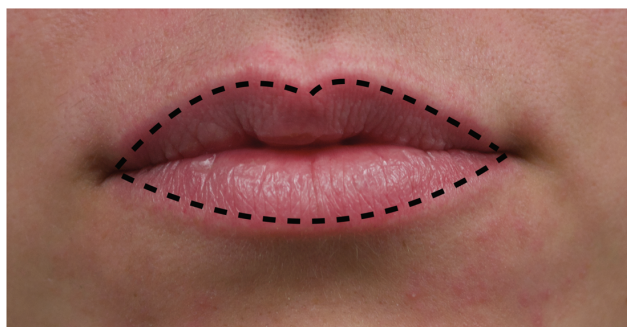

Supplement: Supplementary file [file media-1.pdf]
